# Supplementary material
Source: ML conference proceedings conference paper supplement (https://openreview.net/forum?id=o_sYD-1T2ZZ)

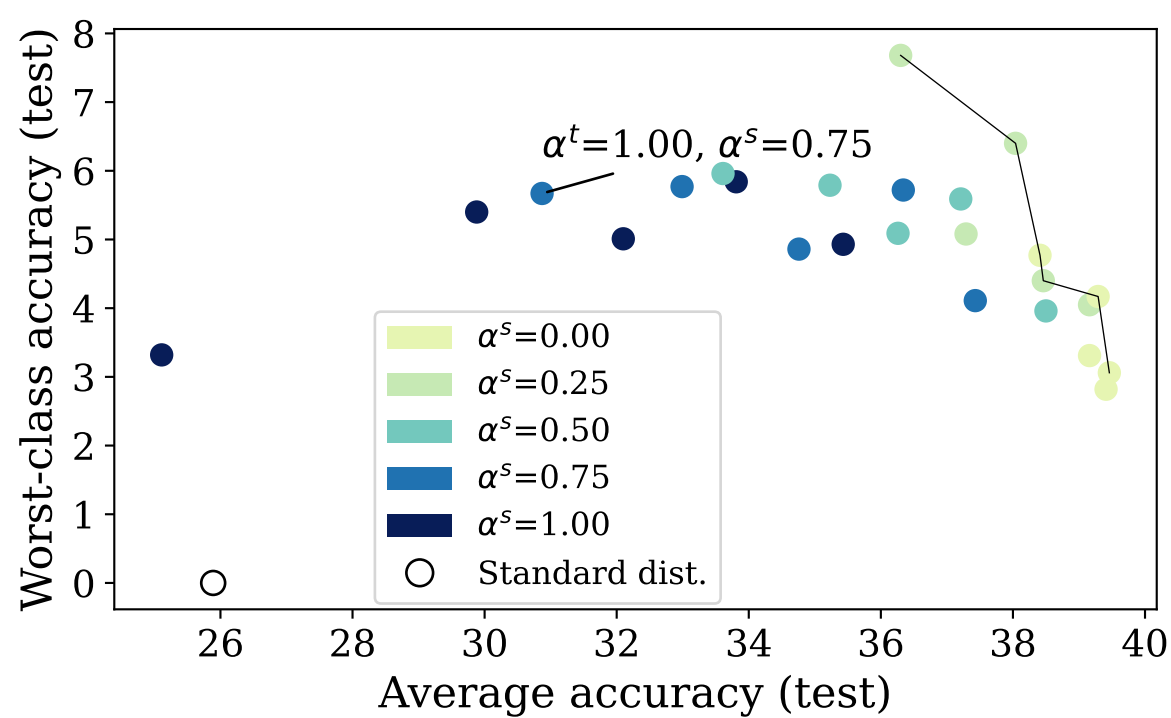

Supplement: supplementary_material [file attachment]

Worst-class accuracy (test)

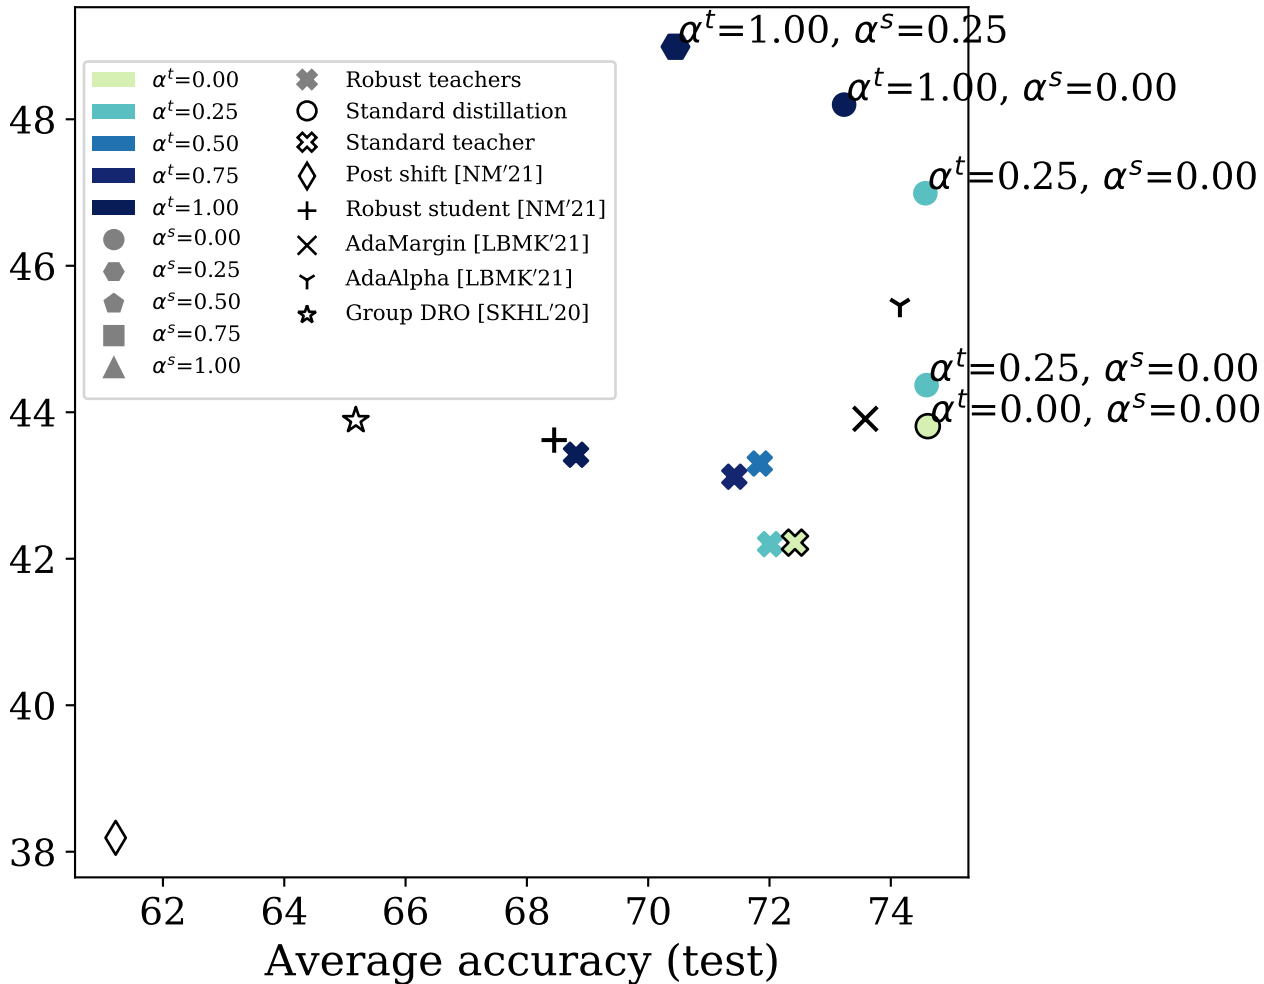

Average accuracy (test)

Supplement: supplementary_material [file attachment]

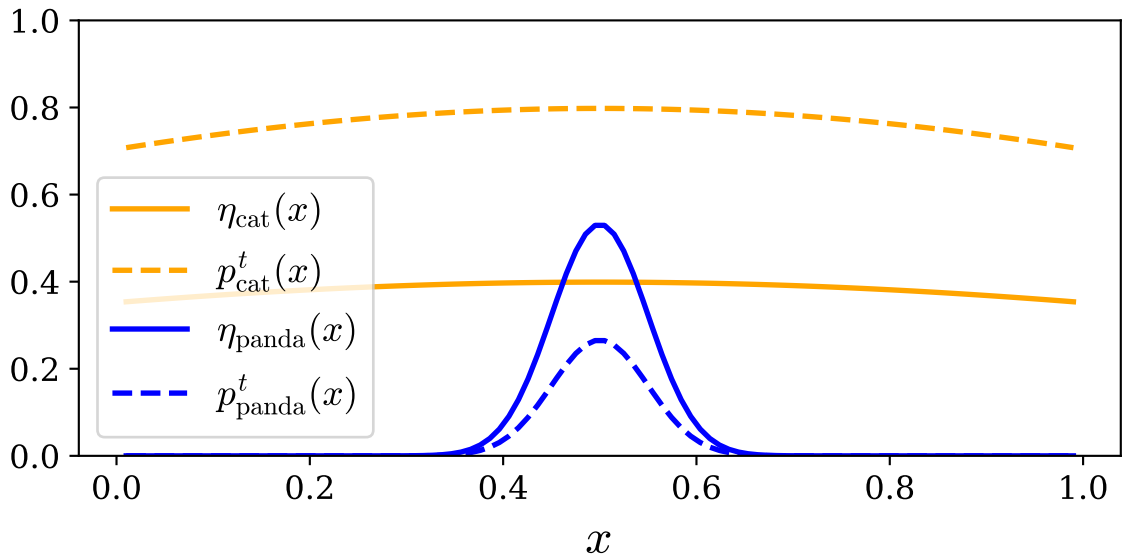

Supplement: supplementary_material [file attachment]

Worst-class accuracy (test)

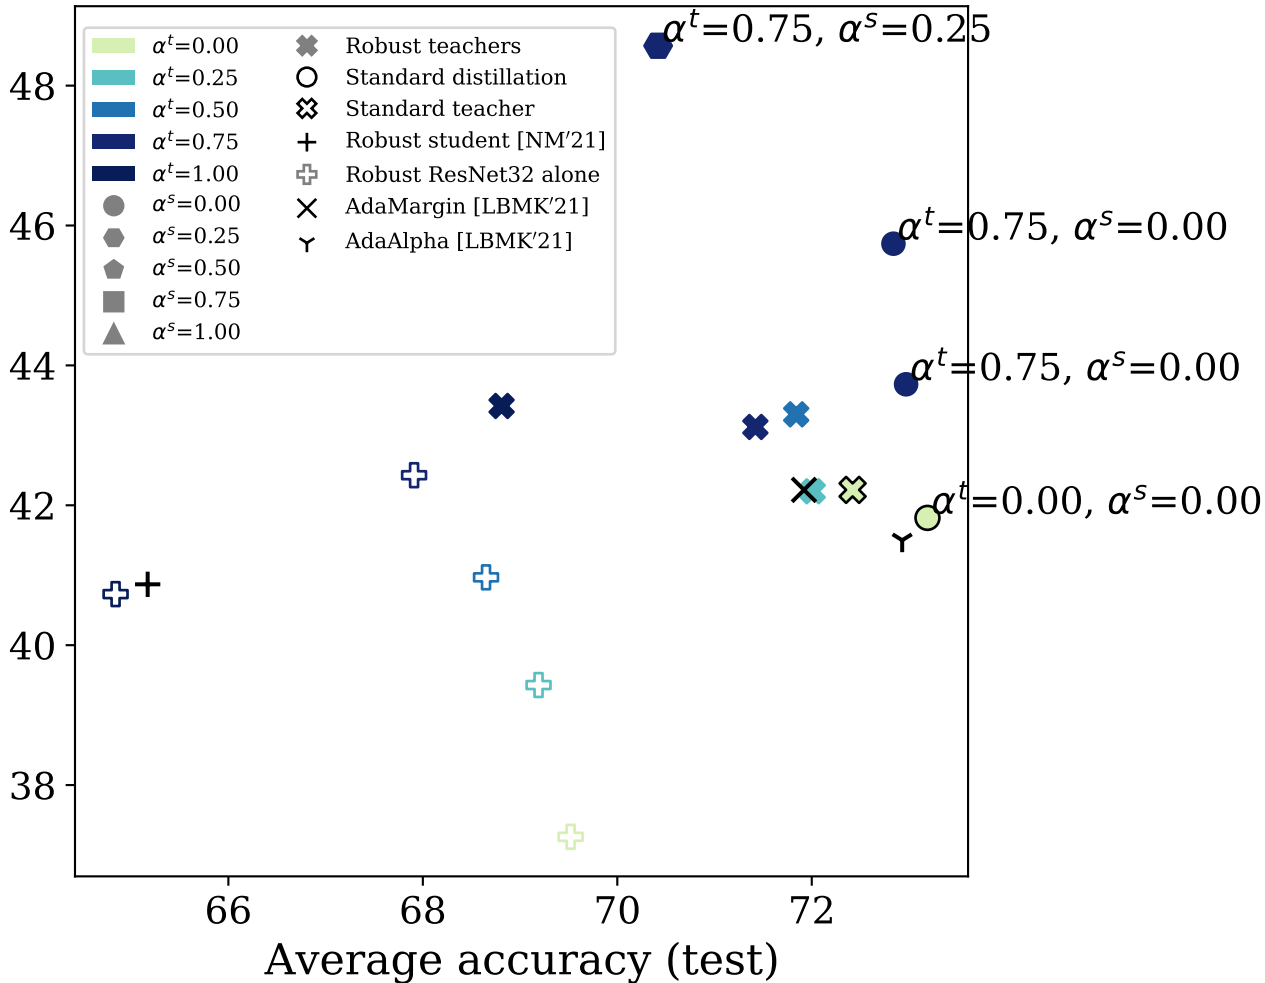

Supplement: supplementary_material [file attachment]

Worst-class accuracy (test)

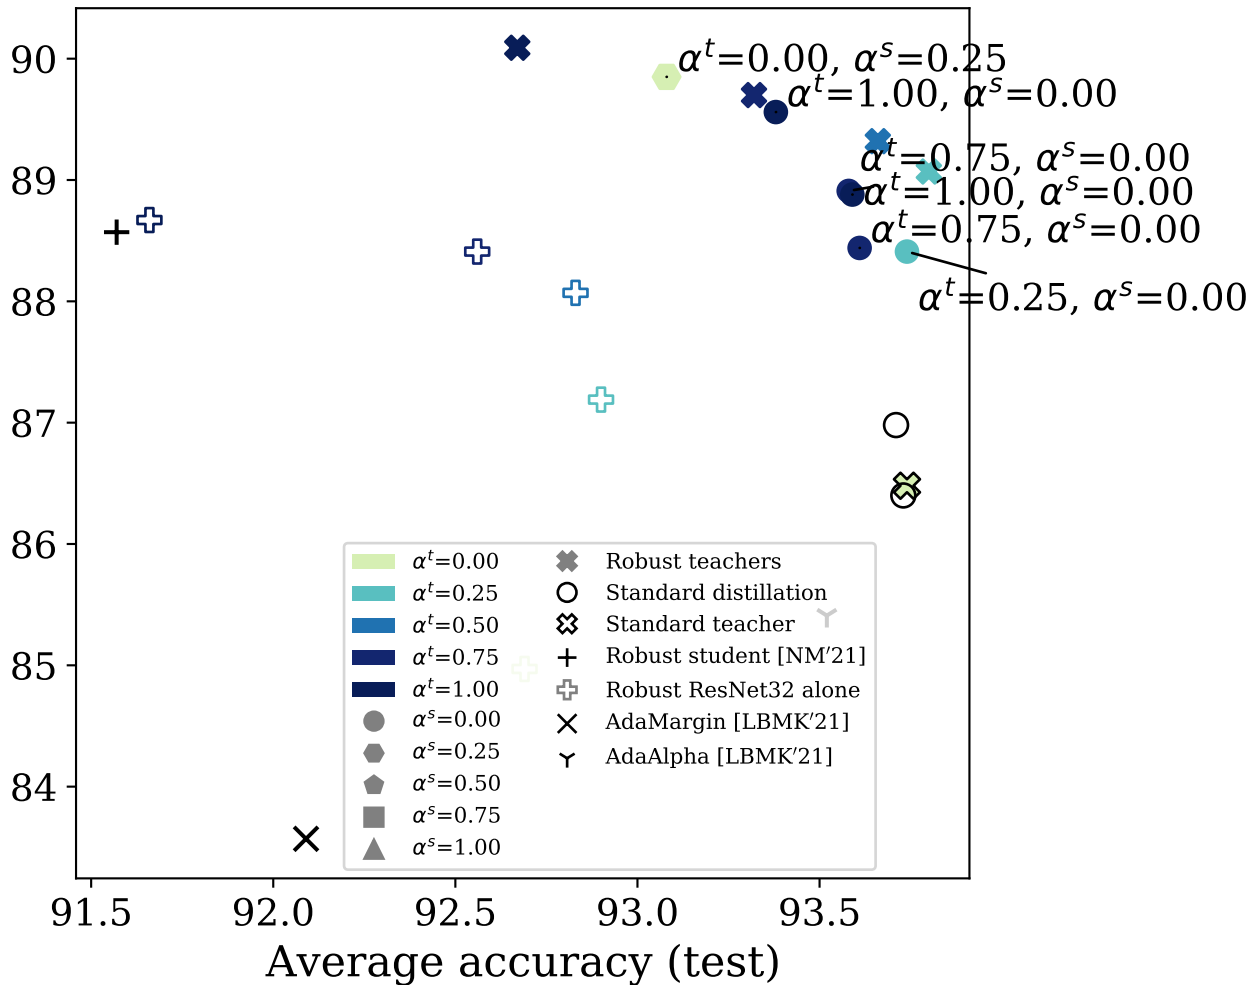

Supplement: supplementary_material [file attachment]

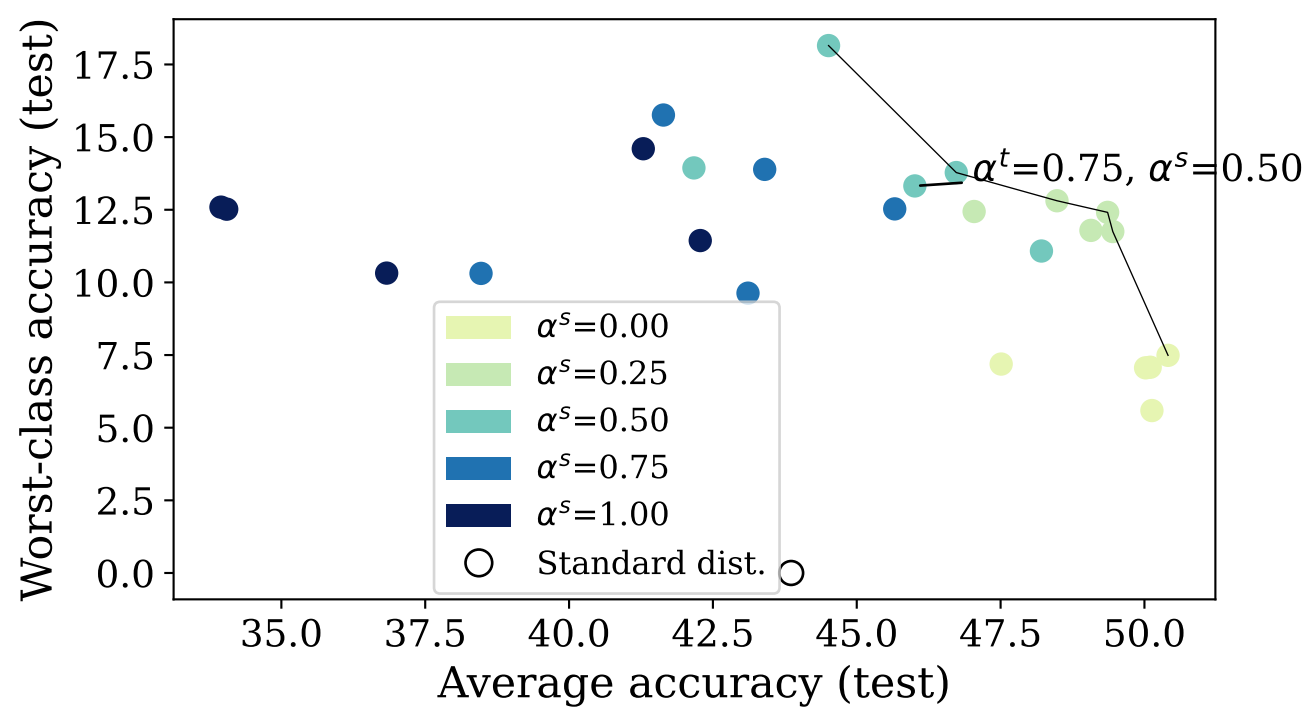

Supplement: supplementary_material [file attachment]

Worst-class accuracy (test)

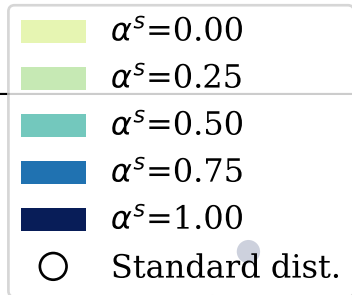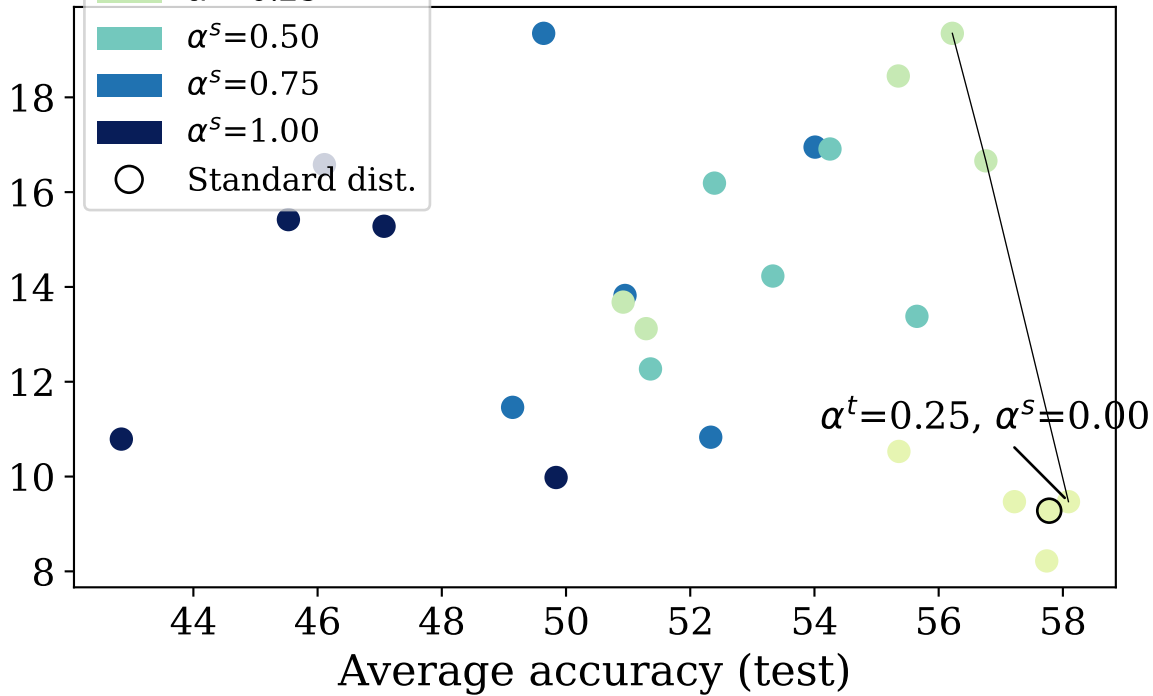

Supplement: supplementary_material [file attachment]

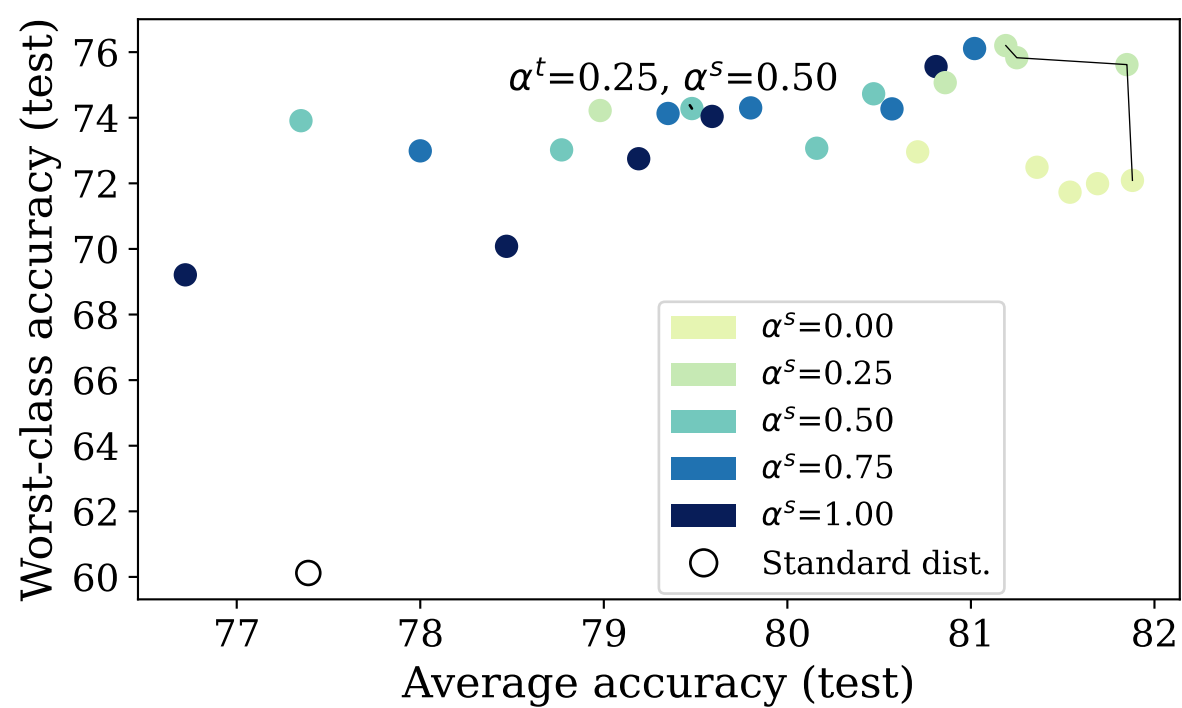

Supplement: supplementary_material [file attachment]

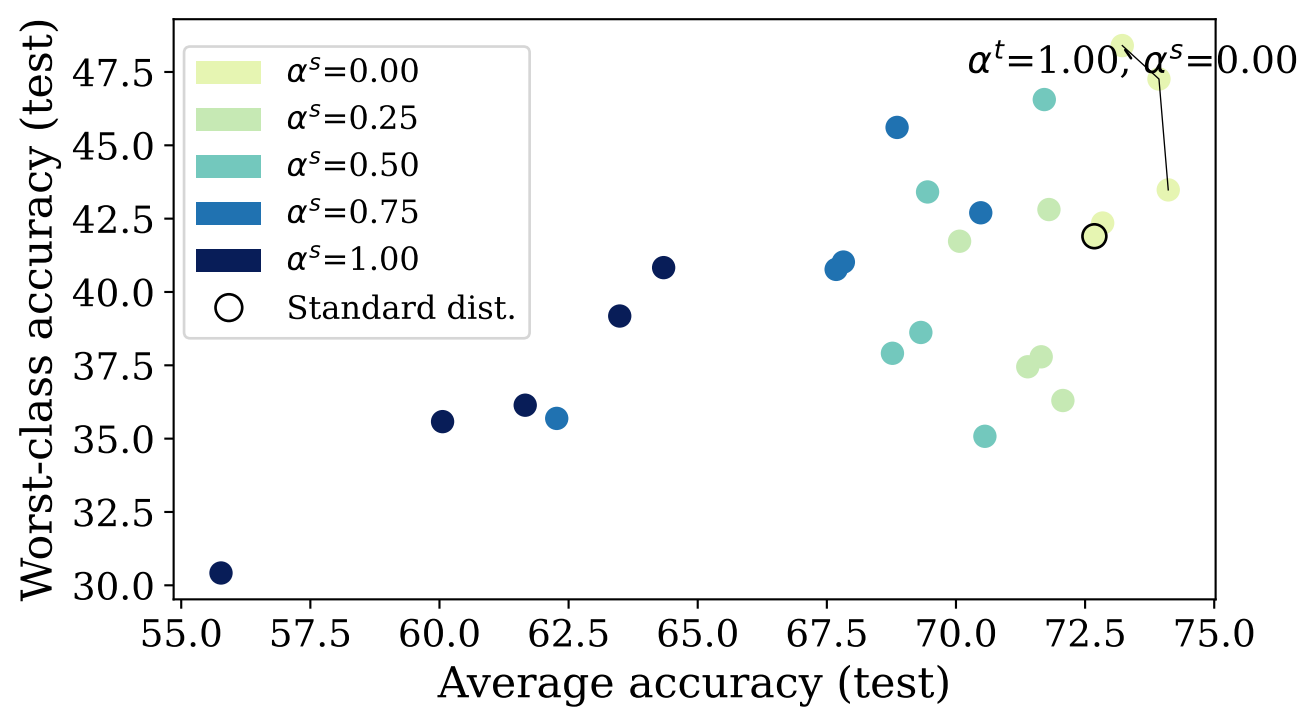

Supplement: supplementary_material [file attachment]

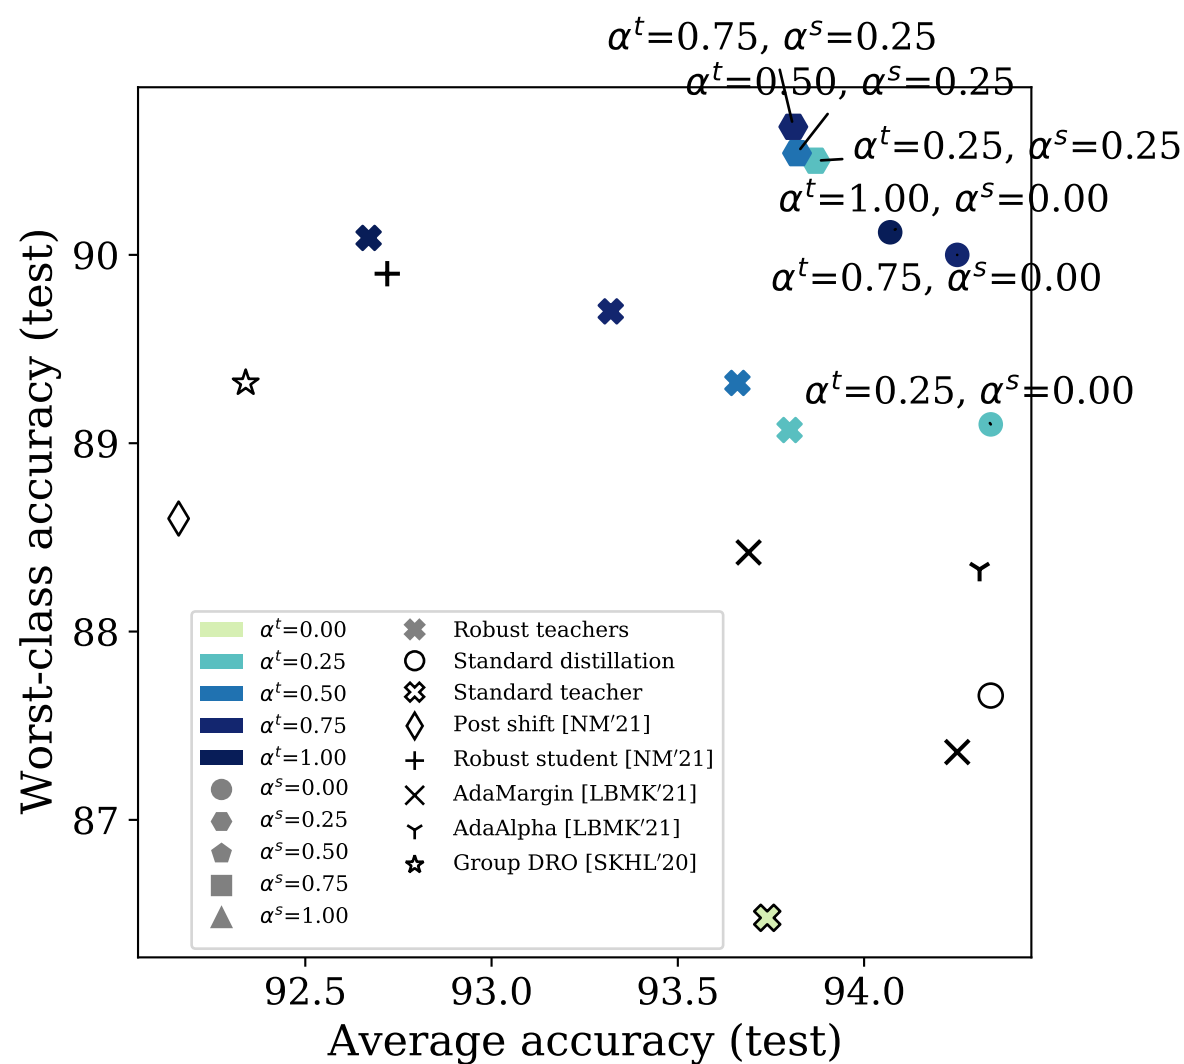

Supplement: supplementary_material [file attachment]

Worst-class accuracy (test)

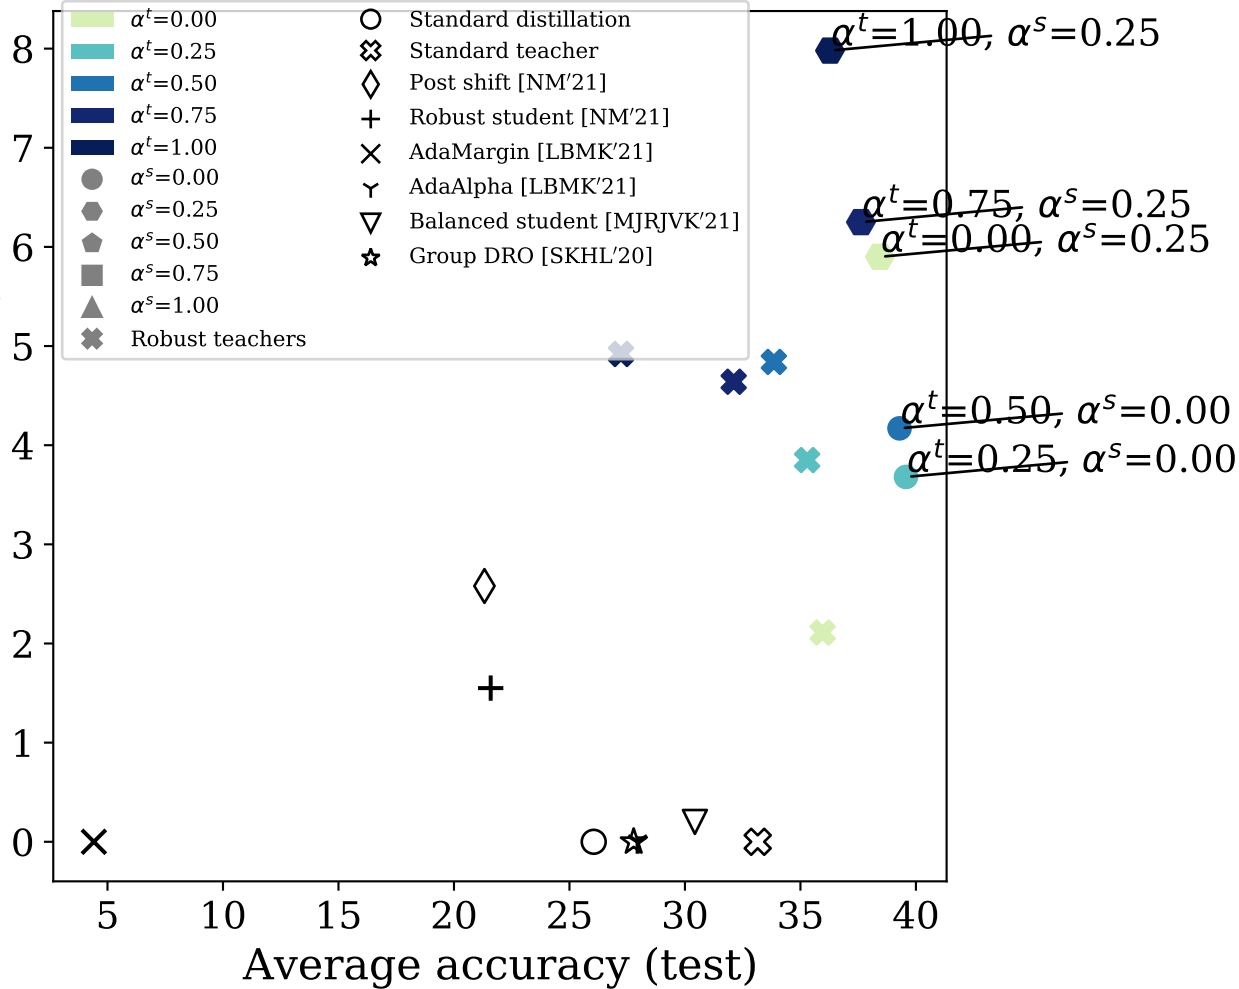

Supplement: supplementary_material [file attachment]

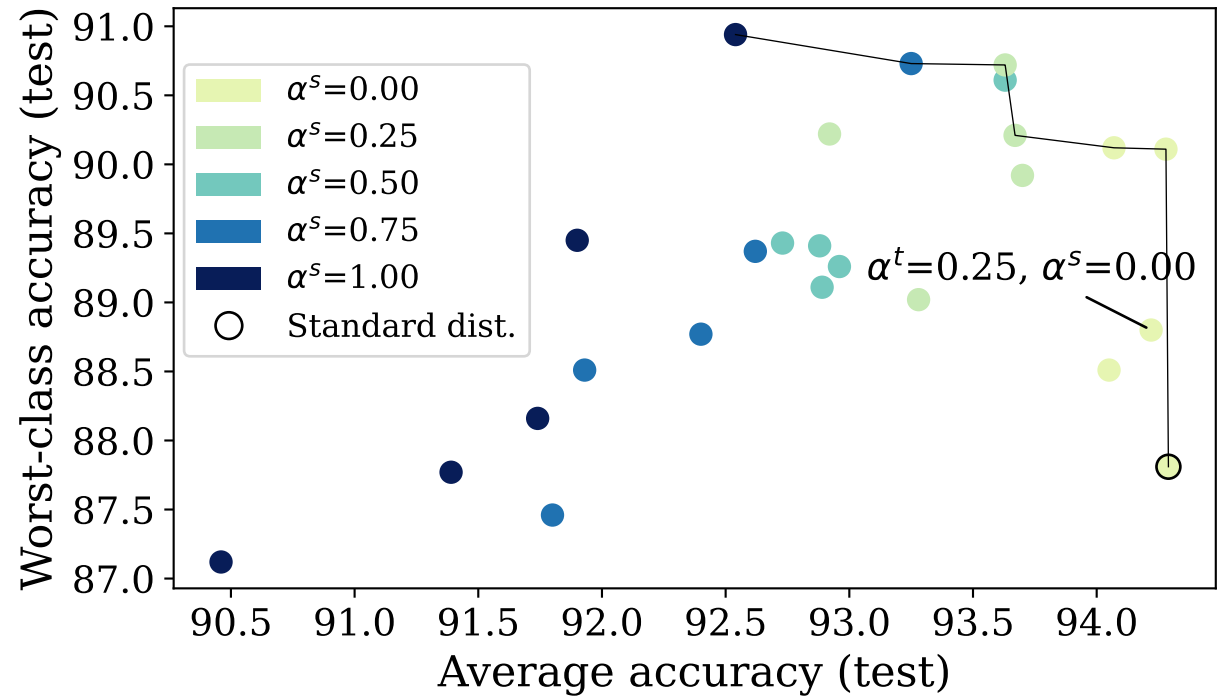

Supplement: supplementary_material [file attachment]

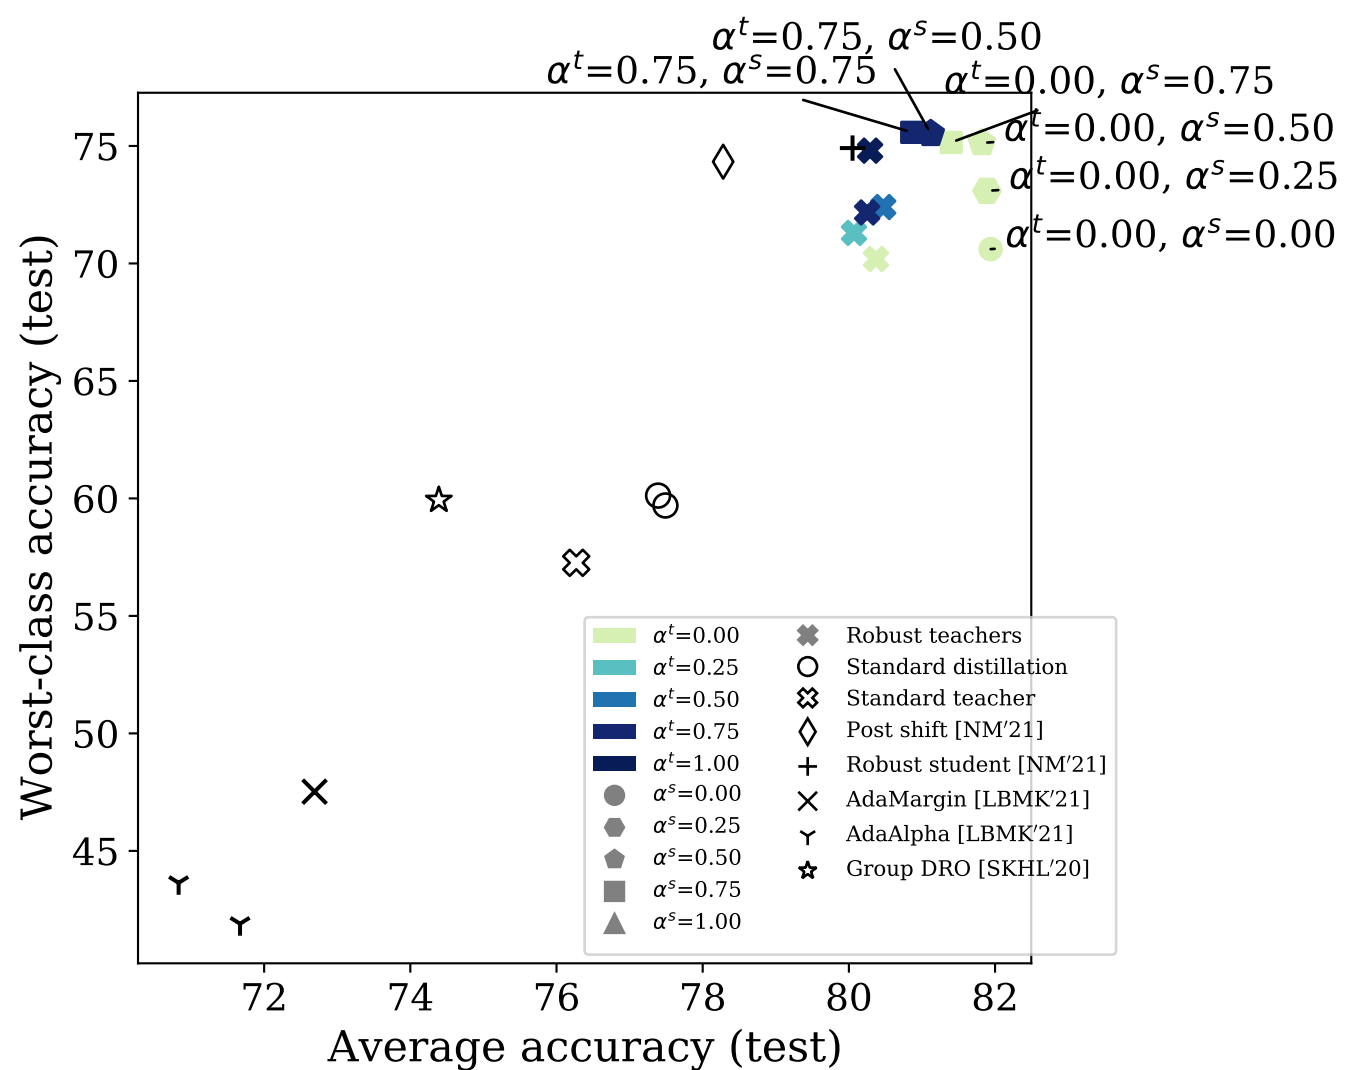

Supplement: supplementary_material [file attachment]

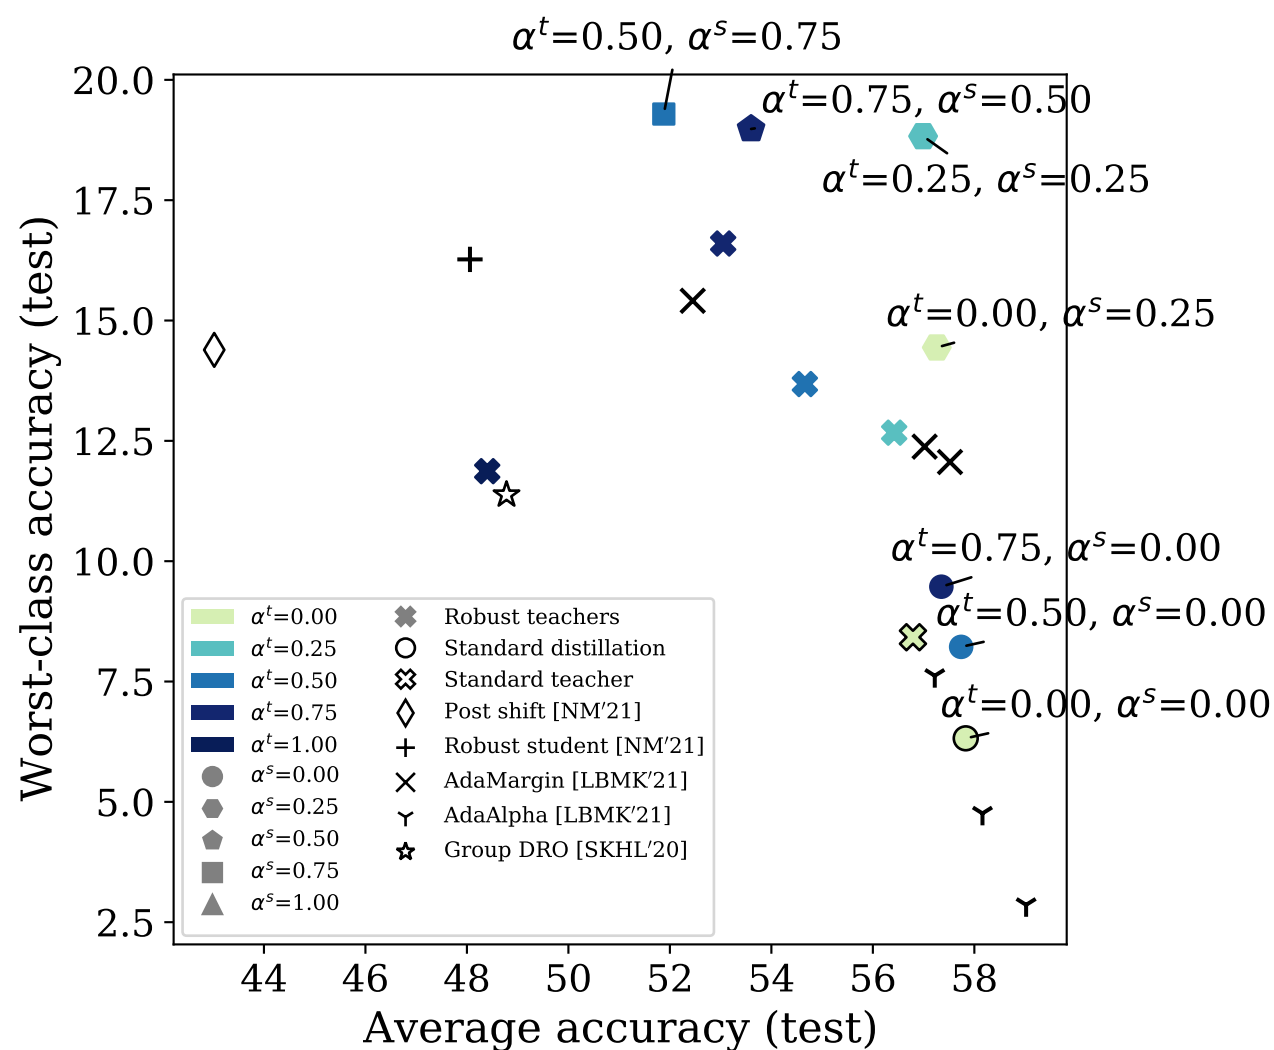

Supplement: supplementary_material [file attachment]

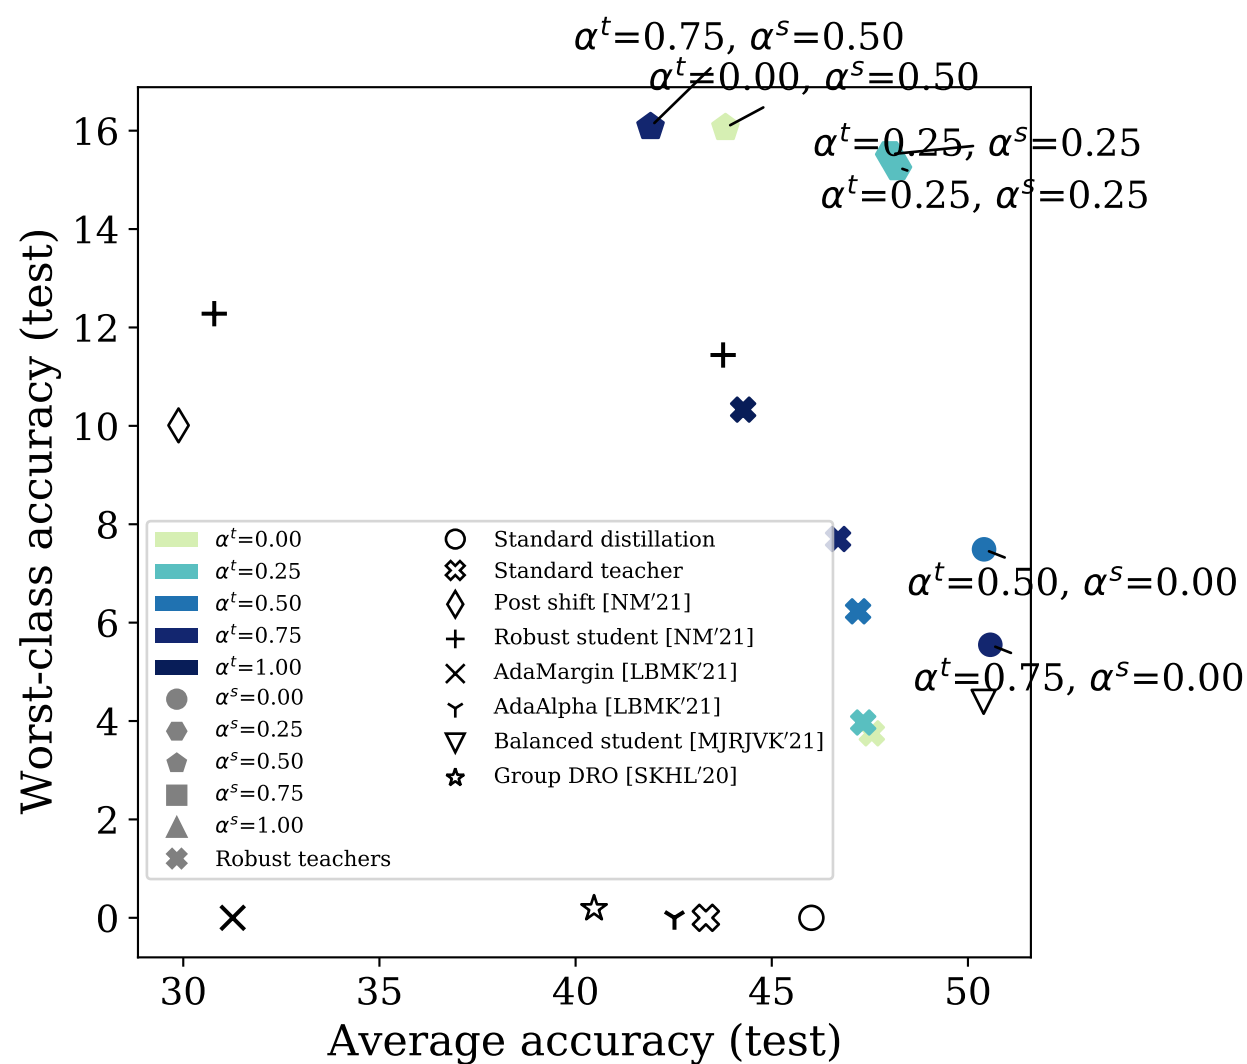

Supplement: supplementary_material [file attachment]
